# Supplementary material for: DeepRePath: Identifying the Prognostic Features of Early-Stage Lung Adenocarcinoma Using Multi-Scale Pathology Images and Deep Convolutional Neural Networks
Source: MDPI journal article supplement (doi:10.3390/cancers13133308), 2021-07-01
Supplement: s1 [file s1]

3923 HE slides from 393 patients with lung cancer

Three pathologists reviewed all slides and selected one representative slide in each cases

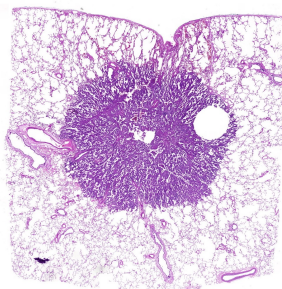

Pathologist #1  
Capture images  
(Seoul, Bucheon, Incheon)

Pathologist #2  
Capture images  
(Yeouido)

Pathologist #3  
Capture images  
(Uijeongbu)

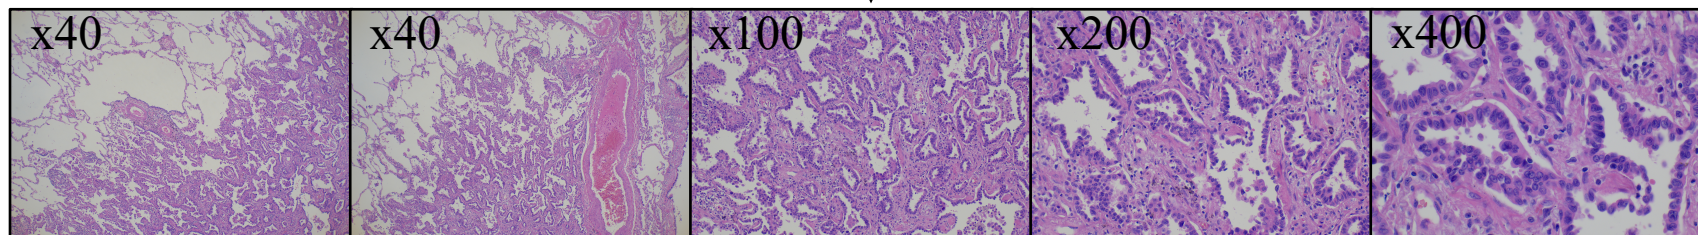

Pathologist #1 and #2 confirmed the quality for capture images
