# Supplementary material for: DeepRePath: Identifying the Prognostic Features of Early-Stage Lung Adenocarcinoma Using Multi-Scale Pathology Images and Deep Convolutional Neural Networks
Source: MDPI journal article supplement (doi:10.3390/cancers13133308), 2021-07-01
Supplement: s1 [file s1]

**Cohort I : Pathology data  
(n=892)**

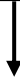

**Assessed for eligibility**

1. Adenocarcinoma
2. Curative resection
3. Stage IA IB IIA IIB
4. Availability of pathology report

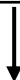

Data following eligibility  
inclusion criteria  
(n=302)

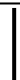

Randomized (n=302)  
Recurrence (n=72)  
Non-Recurrence (n=230)

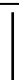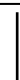

Training + Validation set  
(n=248)

Test set  
(n=54)

Recurrence  
(n=60)

Recurrence  
(n=12)

Non-Recurrence  
(n=188)

Non-Recurrence  
(n=42)

**Cohort II**

External Validation set  
(n=91)

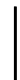

Recurrence  
(n=22)

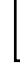

Non-Recurrence  
(n=69)
