# Supplementary material for: DeepRePath: Identifying the Prognostic Features of Early-Stage Lung Adenocarcinoma Using Multi-Scale Pathology Images and Deep Convolutional Neural Networks
Source: MDPI journal article supplement (doi:10.3390/cancers13133308), 2021-07-01
Supplement: s1 [file s1]

**Supplementary Table 1.** Baseline characteristics of the cohort I and cohort II (external validation set)

| Characteristic          |                    | Total        | Cohort I     | Cohort II     | P*    |
|-------------------------|--------------------|--------------|--------------|---------------|-------|
|                         |                    | n = 393      | n = 302      | n = 91        |       |
| Age (years)             | Median (range)     | 64 (25–86)   | 64 (25–86)   | 63 (35–83)    | 0.435 |
| Gender                  | Male               | 204          | 148          | 56            | 0.036 |
|                         | Female             | 189          | 154          | 35            |       |
| Differentiation         | WD (%)             | 132          | 94           | 38            | 0.077 |
|                         | MD (%)             | 208          | 165          | 43            |       |
|                         | PD/UD (%)          | 53           | 43           | 10            |       |
| Tumor size              | Median, cm (range) | 2.3 (0.6–12) | 2.4 (0.6–12) | 2.2 (0.6–6.5) | 0.166 |
| No. of LN positivity    |                    | 0 (0–10)     | 0 (0–10)     | 0 (0–6)       |       |
| T stage                 | T1                 | 216          | 160          | 56            | 0.15  |
|                         | ≥ T2               | 177          | 142          | 35            |       |
| N stage                 | N0                 | 348          | 267          | 81            | 0.875 |
|                         | ≥ N1               | 45           | 35           | 10            |       |
| TNM stage               | I                  | 315          | 239          | 76            | 0.359 |
|                         | ≥ II               | 78           | 63           | 15            |       |
| Lymphovascular invasion | Yes                | 126          | 109          | 17            | 0.002 |
| Adjuvant treatment      | Yes                | 92           | 69           | 23            | 0.344 |
| Recurrence              | Yes (< 3years)     | 94           | 72           | 22            | 0.948 |
|                         | No (> 3years)      | 299          | 230          | 69            |       |

LN, lymph node; WD, well-differentiated; MD, moderately differentiated; PD, poorly differentiated; UD, undifferentiated;

P\*, A two-sided P-value of <0.05, was considered statistically significant. Categorical variables were compared using the chi-square test

**Supplementary Table 2.** The institutes of the cohort I and cohort II (external validation set)

| <b>Cohort I</b>  |                             |                    |                       |       |
|------------------|-----------------------------|--------------------|-----------------------|-------|
| Institute        | Training set (%)            | Validation set (%) | Internal test set (%) | Total |
| Incheon          | 22 (9.9)                    | 3 (12.0)           | 5 (9.3))              | 30    |
| Uijeongbu        | 15 (6.7)                    | 2 (8.0)            | 3 (5.5)               | 20    |
| Seoul            | 186 (83.4)                  | 20 (80.0)          | 46 (85.2)             | 252   |
| Total            | 223                         | 25                 | 54                    | 302   |
| <b>Cohort II</b> |                             |                    |                       |       |
| Institute        | External validation set (%) |                    |                       |       |
| Yeouido          | 39 (42.9)                   |                    |                       |       |
| Bucheon          | 52 (57.1)                   |                    |                       |       |
| Total            | 91                          |                    |                       |       |

**Supplementary Table 3.** Comparison of the performance of models using XGBoost, Gradient Boosting, and AdaBoost for cohort I (training set) and cohort II (external validation set)

| Cohort | Model                             | Sensitivity<br>(%) | Specificity<br>(%) | PPV<br>(%) | NPV<br>(%) | Accuracy<br>(%) | AUC  |
|--------|-----------------------------------|--------------------|--------------------|------------|------------|-----------------|------|
| I      | DeepRePath with XGBoost           | 74                 | 78                 | 59         | 89         | 77              | 0.77 |
|        | DeepRePath with Gradient Boosting | 71                 | 71                 | 49         | 87         | 71              | 0.73 |
|        | DeepRePath with AdaBoost          | 65                 | 73                 | 52         | 86         | 71              | 0.72 |
| II     | DeepRePath with XGBoost           | 86                 | 74                 | 51         | 94         | 77              | 0.76 |
|        | DeepRePath with Gradient Boosting | 71                 | 82                 | 55         | 90         | 79              | 0.75 |
|        | DeepRePath with AdaBoost          | 78                 | 53                 | 33         | 89         | 59              | 0.54 |

XGBoost, eXtreme gradient boosting; AdaBoost, adaptive boosting; PPV, positive predictive value; NPV, negative predictive value; AUC, area under the curve; TL, transfer learning
